# Supplementary material for: HSP90 Inhibitor, 17-DMAG, Alone and in Combination with Lapatinib Attenuates Acquired Lapatinib-Resistance in ER-positive, HER2-Overexpressing Breast Cancer Cell Line
Source: MDPI journal article supplement (doi:10.3390/cancers12092630), 2020-09-15
Supplement: s1 [file s1]

Article

# HSP90 Inhibitor, 17-DMAG, Alone and in Combination with Lapatinib Attenuates Acquired Lapatinib-Resistance in ER-positive, HER2-Overexpressing Breast Cancer Cell Line

Hye Jin Lee <sup>1</sup>, Seungho Shin <sup>2</sup>, Jinho Kang <sup>1</sup>, Ki-Cheol Han <sup>3</sup>, Yeul Hong Kim <sup>1</sup>, Jeoung-Won Bae <sup>2</sup> and Kyong Hwa Park <sup>1,\*</sup>

<sup>1</sup> Division of Oncology/Hematology, Department of Internal Medicine, Korea University College Medicine, Seoul 02841, Korea; lhj5727@korea.ac.kr (H.J.L.); chinhokang@naver.com (J.K.); yhk0215@korea.ac.kr (Y.H.K.)

<sup>2</sup> Departments of Breast and Endocrine surgery, Korea University College Medicine, Seoul 02841, Korea; sshhere@naver.com (S.S.); kujwbae@korea.ac.kr (J.-W.B.)

<sup>3</sup> Center for Theragnosis, Biomedical Research Institute, Korea Institute of Science and Technology, Seoul 02456, Korea; biolord@kist.re.kr

\* Correspondence: khpark@korea.ac.kr; Tel.: +82-2-920-6841

Received: 7 August 2020; Accepted: 12 September 2020; Published: date

**Supplementary materials**

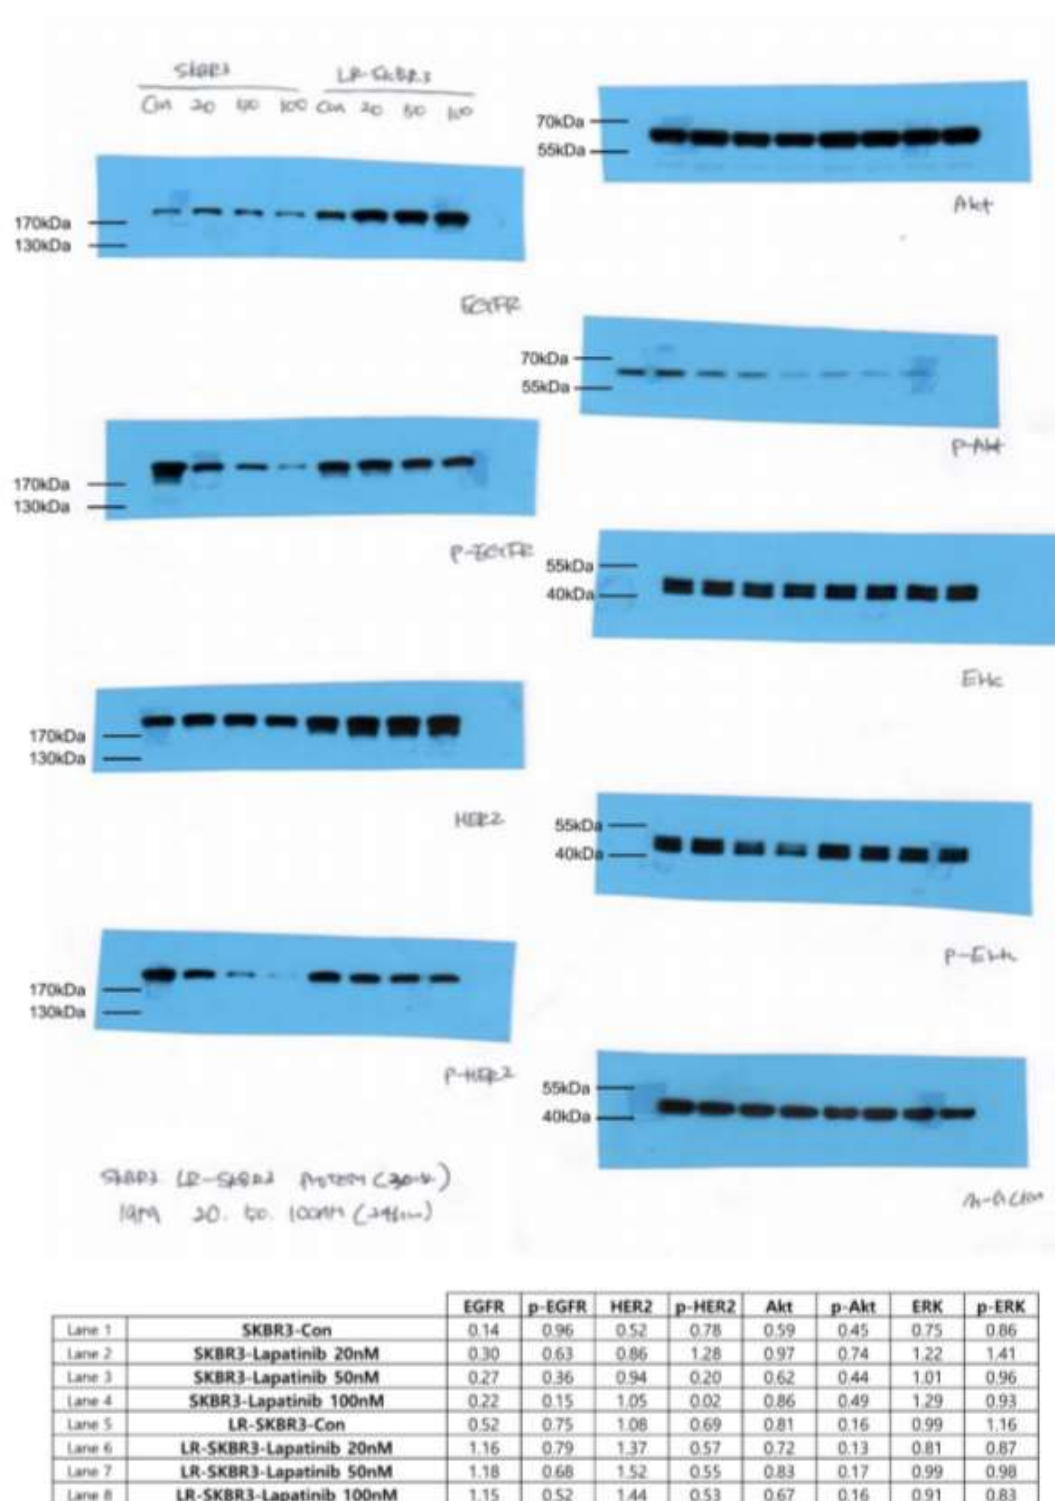

**Figure S1.** Original image and band density analysis in Figure 1B for western blot in SKBR3 and LR-SKBR3 cell lines.

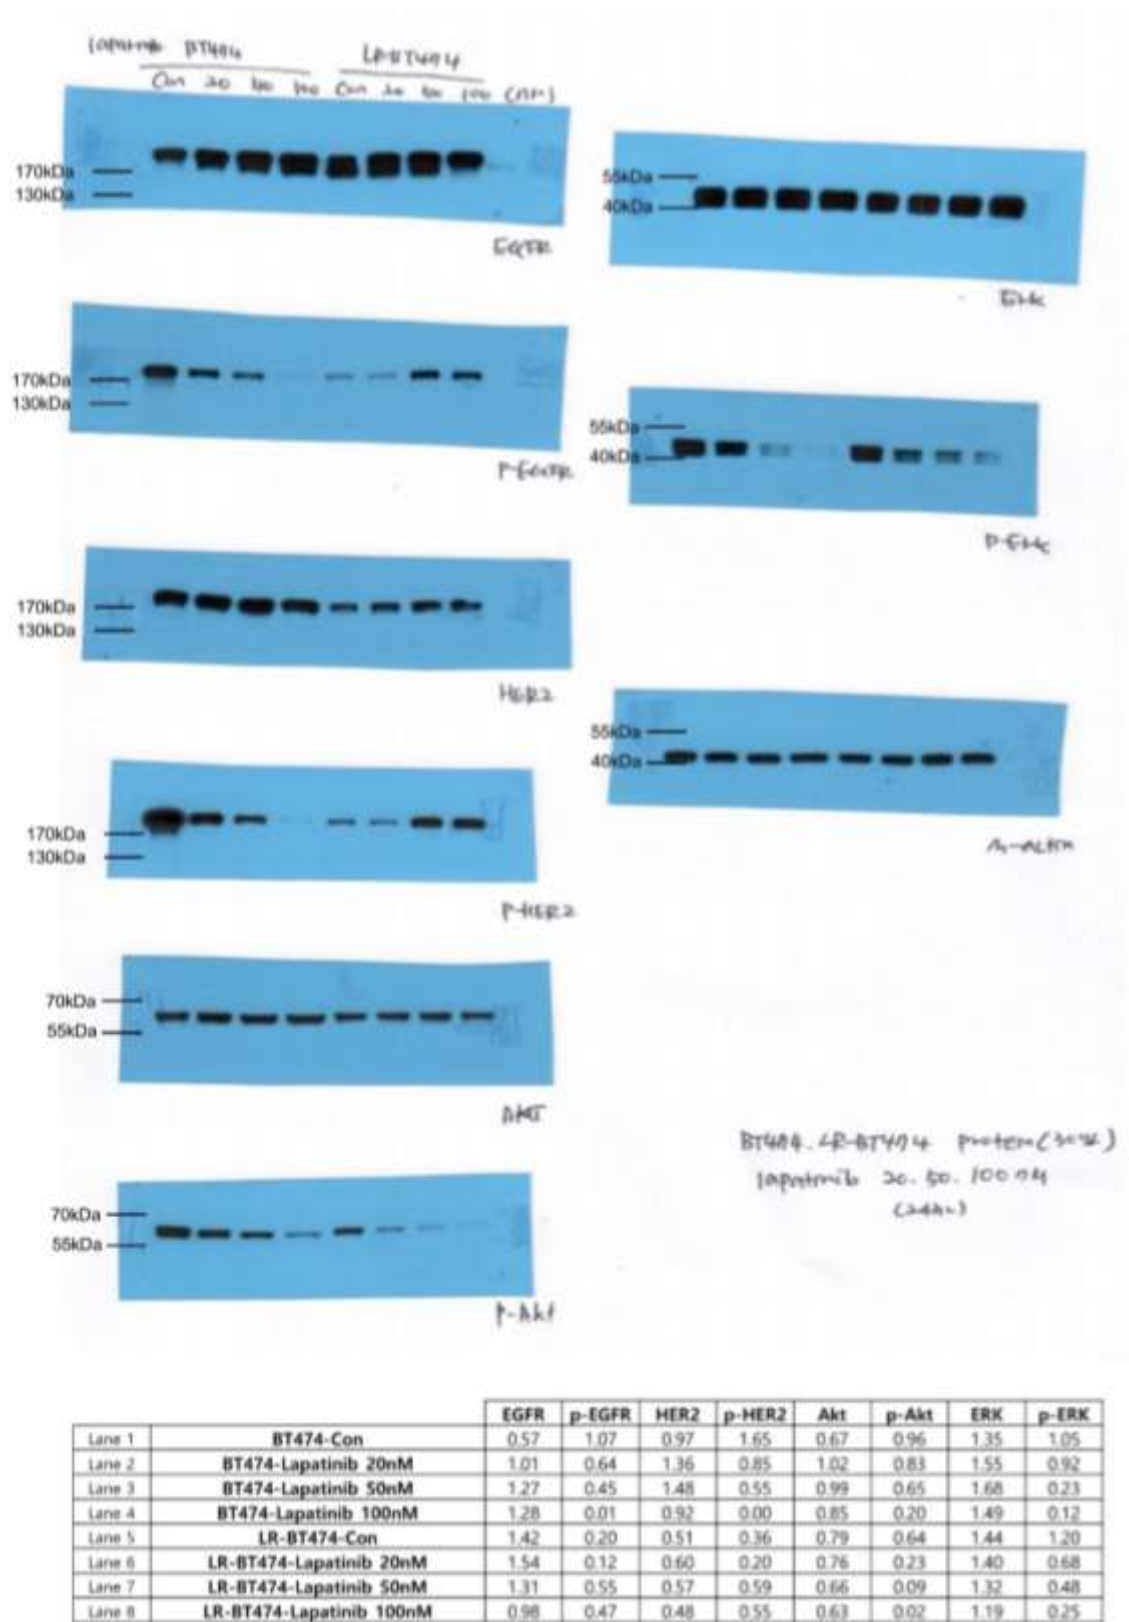

**Figure S2.** Original image and band density analysis in Figure 1B for western blot in BT474 and LR-BT474 cell lines.

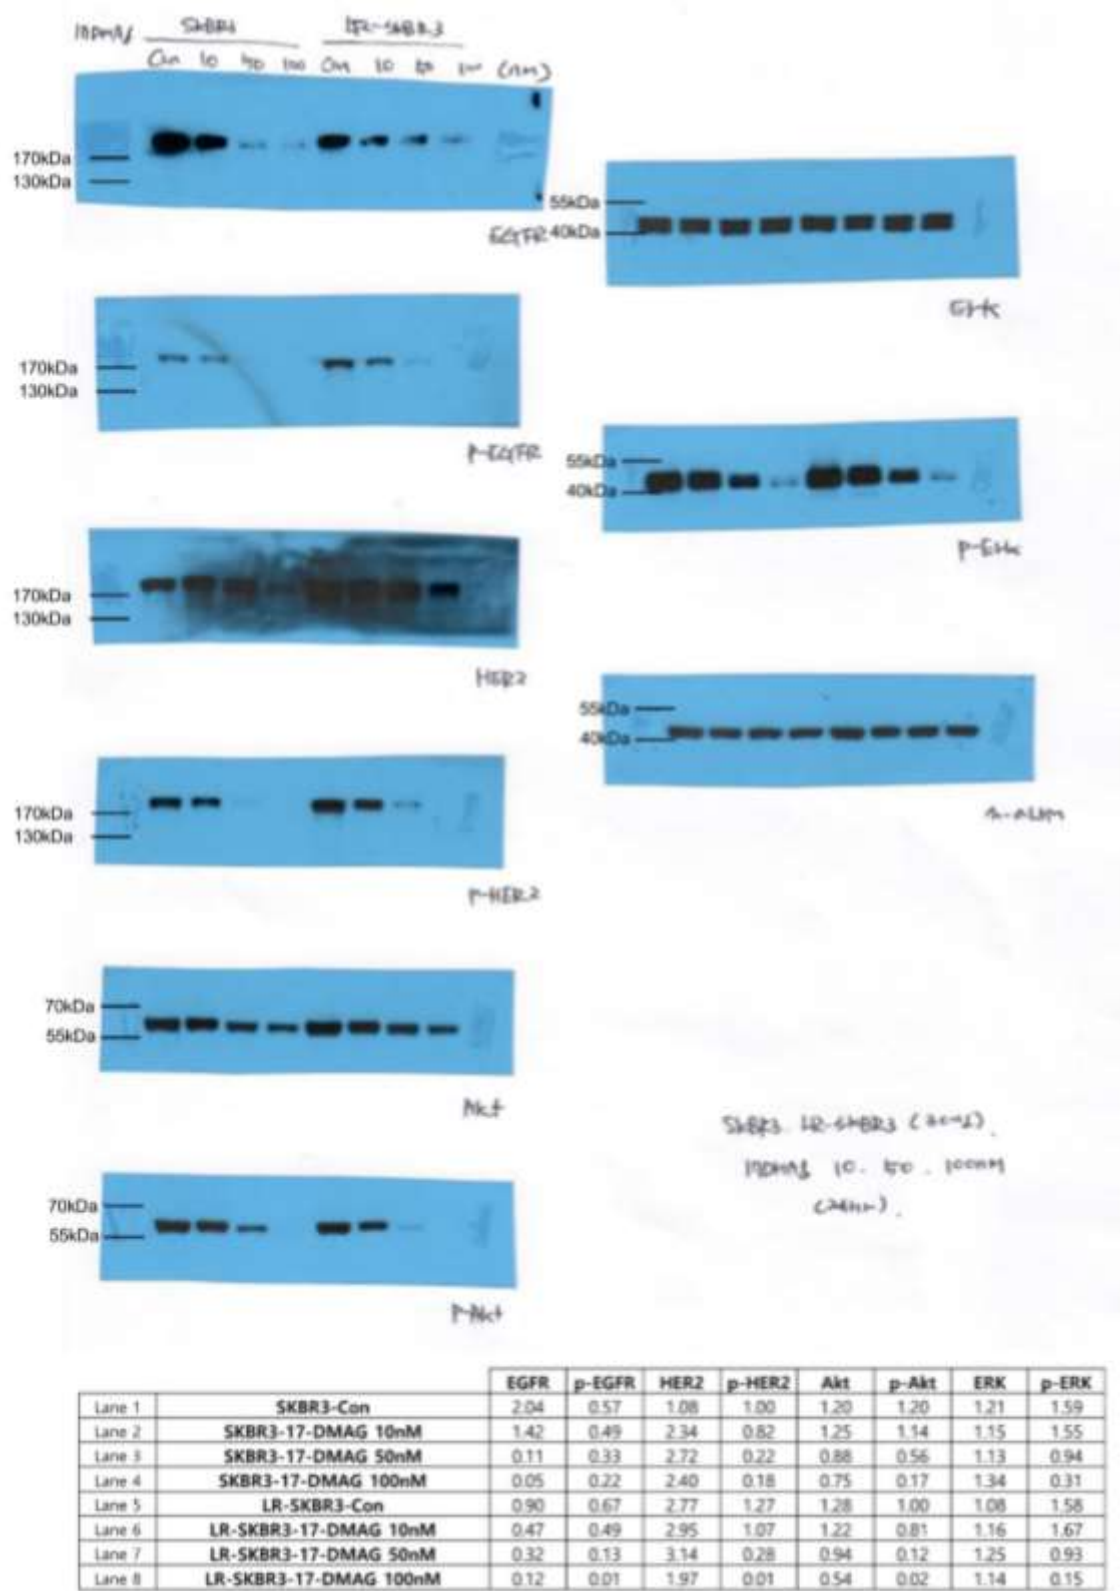

**Figure S3.** Original image and band density analysis in Figure 4B for western blot in SKBR3 and LR-SKBR3 cell lines.

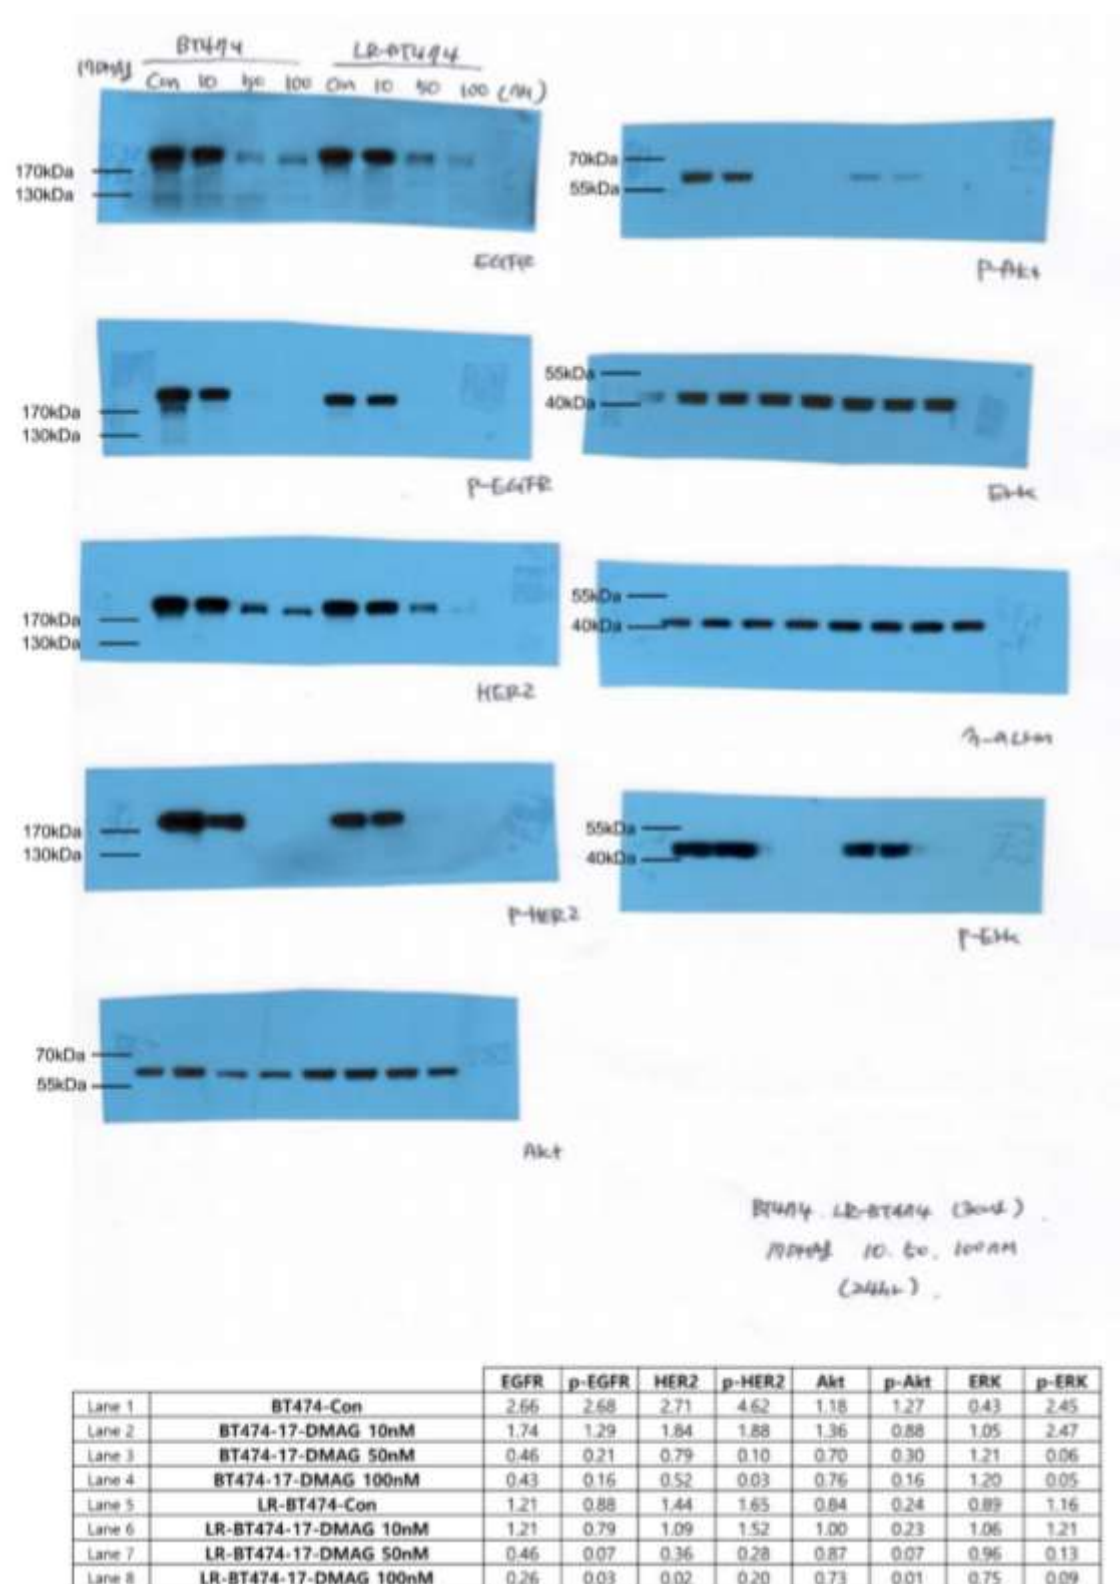

**Figure S4.** Original image and band density analysis in Figure 4B for western blot in BT474 and LR-BT474 cell lines.

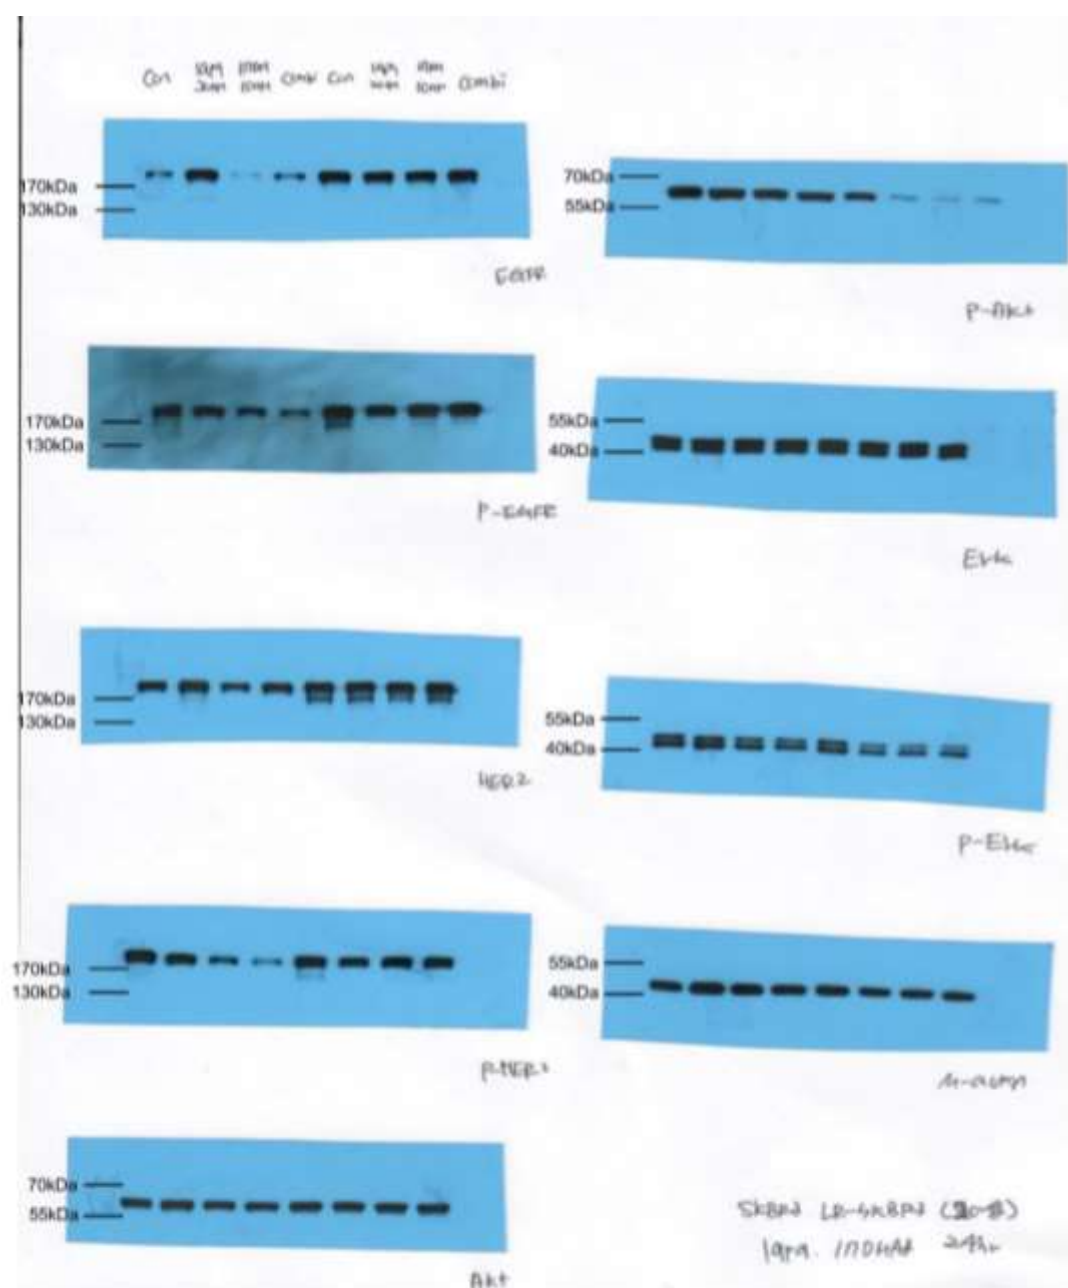

|        |                              | EGFR | p-EGFR | HER2 | p-HER2 | Akt  | p-Akt | ERK  | p-ERK |
|--------|------------------------------|------|--------|------|--------|------|-------|------|-------|
| Lane 1 | SKBR3-Con                    | 0.47 | 1.67   | 0.72 | 1.34   | 0.80 | 1.36  | 1.21 | 0.89  |
| Lane 2 | SKBR3-Lapatinib 20nM         | 0.94 | 1.03   | 0.67 | 0.66   | 0.58 | 0.79  | 0.89 | 0.74  |
| Lane 3 | SKBR3-17-DMAG 10nM           | 0.15 | 0.97   | 0.47 | 0.48   | 0.63 | 0.86  | 1.06 | 0.62  |
| Lane 4 | SKBR3-Lapa 20nM+17DM 10nM    | 0.46 | 0.81   | 0.69 | 0.27   | 0.69 | 0.87  | 1.15 | 0.55  |
| Lane 5 | LR-SKBR3-Con                 | 1.28 | 1.54   | 1.13 | 1.16   | 0.76 | 0.64  | 1.08 | 0.83  |
| Lane 6 | LR-SKBR3-Lapatinib 20nM      | 1.56 | 1.03   | 1.51 | 0.86   | 0.97 | 0.17  | 1.39 | 0.57  |
| Lane 7 | LR-SKBR3-17-DMAG 10nM        | 1.38 | 1.09   | 1.32 | 0.97   | 1.00 | 0.06  | 1.44 | 0.56  |
| Lane 8 | LR-SKBR3-Lapa 20nM+17DM 10nM | 1.62 | 1.25   | 1.36 | 0.93   | 0.98 | 0.11  | 1.38 | 0.71  |

**Figure S5.** Original image and band density analysis in Figure 5B for western blot in SKBR3 and LR-SKBR3 cell lines.



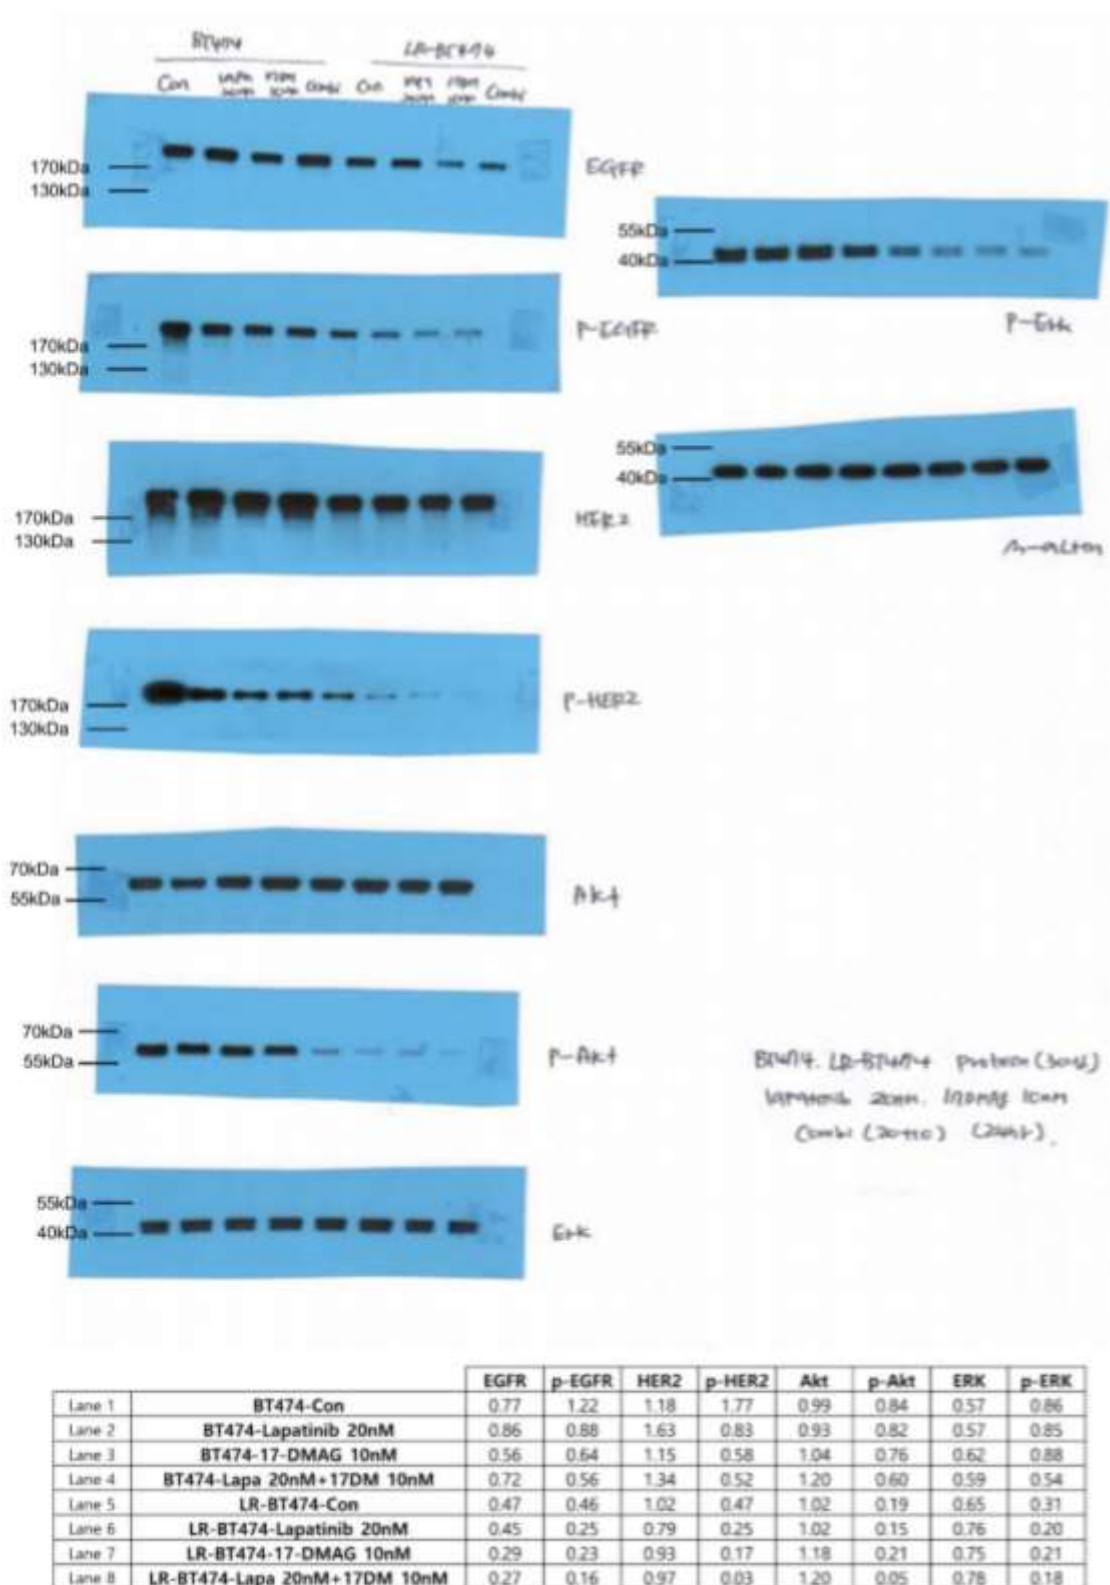

**Figure S6.** Original image and band density analysis in Figure 5B for western blot in BT474 and LR-BT474 cell lines.
